# 1 Comparing Sexual Network Mean Active Degree Measurement 2 Metrics among Men who have Sex with Men

## 3 4 **Authors**

5 Christina Chandra MPH<sup>1</sup>, Martina Morris PhD<sup>2</sup>, Connor Van Meter MPH<sup>1</sup>, Steven M. Goodreau  
6 PhD<sup>3</sup>, Travis Sanchez DVM<sup>1</sup>, Patrick Janulis PhD<sup>4</sup>, Michelle Birkett PhD<sup>4</sup>, Samuel M. Jenness  
7 PhD<sup>1</sup>

8 <sup>1</sup> Department of Epidemiology, Rollin School of Public Health, Emory University, Atlanta, GA

9 <sup>2</sup> Department of Sociology, University of Washington, Seattle, WA

10 <sup>3</sup> Department of Anthropology, University of Washington, Seattle, WA

11 <sup>4</sup> Department of Medical Social Sciences, Feinberg School of Medicine, Northwestern University,  
12 Chicago, IL

13

## 14 **Correspondence**

15 *Christina Chandra, Emory University, 1520 Clifton Road, Atlanta, GA 30323. Email:*

16 [christina.lynne.chandra@emory.edu](mailto:christina.lynne.chandra@emory.edu).

17

## 18 **Funding**

19 This work was supported by National Institutes of Health grants R21 MH112449 and R01  
20 AI138783, and a grant from the MAC AIDS Fund.

21

## 22 **Conflicts of Interest**

23 The authors declare no conflicts of interest.

24

## 25 **Word Counts**

26 Abstract: 249 words

27 Text: 3393 words

28

## 29 **Keywords**

30 Sexual networks, HIV, sexually transmitted infection, men who have sex with men, partnerships

31

## 32 **Summary**

33 Survey designs can lead to potential bias, such as underestimation, in the measurement of  
34 mean active degree in sexual networks of men who have sex with men.

35 **ABSTRACT**

36 **Background** Mean active degree is an important proxy measure of cross-sectional network  
37 connectivity commonly used in HIV/STI epidemiology research. No current studies have  
38 compared measurement methods of mean degree using cross-sectional surveys for men  
39 who have sex with men (MSM) in the United States.

40 **Methods** We compared mean degree estimates based on reported ongoing main and casual  
41 sexual partnerships (*current method*) against dates of first and last sex (*retrospective*  
42 *method*) from 0–12 months prior to survey date in ARTnet, a cross-sectional survey of  
43 MSM in the U.S. (2017–2019). ARTnet collected data on the number of sexual partners  
44 in the past year but limited reporting on details used for calculating mean degree to the 5  
45 most recent partners. We used linear regression to understand the impact of truncated  
46 partnership data on mean degree estimation.

47 **Results** Retrospective method mean degree systematically decreased as the month at which it  
48 was calculated increased from 0–12 months prior to survey date. Among participants with  
49 >5 partners in the past year compared to those with ≤5, the average change in main  
50 degree between 12 and 0 months prior to survey date was -0.05 (95% CI: -0.08, -0.03)  
51 after adjusting for race/ethnicity, age, and education. The adjusted average change in  
52 casual degree was -0.40 (95% CI: -0.45, -0.35).

53 **Conclusions** The retrospective method underestimates mean degree for MSM in surveys with  
54 truncated partnership data, especially for casual partnerships. The current method is less  
55 prone to bias from partner truncation when the target population experiences higher  
56 cumulative partners per year.

## 57 INTRODUCTION

58 In the United States, men who have sex with men (MSM) experience a disproportionate burden of  
59 HIV and bacterial sexually transmitted infections (STIs). In 2018, MSM accounted for 66% of all new  
60 HIV diagnoses, 54% of primary and secondary syphilis cases, and 43% of gonorrhea cases.<sup>1,2</sup>  
61 Young, non-white MSM are particularly affected by HIV/STIs despite evidence that individual risk  
62 behaviors are not different between Black and white MSM.<sup>3</sup> Differences in sexual network  
63 connectivity, the mechanistic pathway for HIV/STI transmission, may explain these disparities  
64 among MSM in the U.S.<sup>4,5</sup> Networks are also essential for deploying prevention tools, such as HIV  
65 PrEP or STI partner services.<sup>6,7</sup>

66 The potential effectiveness of a network-informed HIV/STI public health response depends  
67 on good empirical metrics: accurate and unbiased estimates of observable behaviors that determine  
68 the unobservable network connectivity. One common metric is active degree: the count of current,  
69 ongoing partners at a point in time, which may be summarized as the mean active degree across  
70 nodes (persons) at the population level. It is mathematically established and intuitive that network  
71 connectivity rises as mean degree increases, though the relation is non-linear.<sup>7</sup> Active degree also  
72 forms the definitional basis of partnership concurrency (active degree of two or more). Modeling has  
73 demonstrated that higher mean active degree and higher prevalence of concurrency create network  
74 conditions that lead to more rapid and pervasive HIV/STI spread within networks.<sup>5,8</sup> Even small  
75 changes in mean active degree can have a substantial impact on network connectivity, and  
76 subsequently epidemic persistence or elimination, due to the non-linear threshold effects.<sup>9</sup> For this  
77 reason, accurate measurement of mean active degree is needed to assess epidemic potential.

78 UNAIDS focused on this problem in a reference group meeting in 2009, leading to published  
79 recommendations for measuring active degree and calculating point prevalence of concurrency as  
80 an indicator for monitoring national HIV epidemics.<sup>10</sup> Approaches they considered were: 1) active  
81 degree as measured on the day of survey (“current method”); 2) using reported dates of first and last  
82 sex with each partner during the last year (“retrospective method”). UNAIDS recommended the  
83 latter. **Figure 1** provides a schematic of how the current and retrospective methods are used to  
84 calculate mean degree with hypothetical data.

85 The goal of the current method is to measure the person’s ongoing sexual partnerships on the  
86 day of the survey. This can be done on a partner-by-partner basis after enumerating relevant  
87 partners (e.g., “Do you expect to have sex with this person again?”), or with a single summary

88 question (e.g., “With how many people do you currently have an active sexual relationship?”). Active  
89 degree is measured as the sum of ongoing partnerships reported. This approach does not depend  
90 on recall of events or dates and can be asked in a single question if time and respondent burden are  
91 concerns. The drawback is that respondents must accurately predict whether a partnership will  
92 continue. While that may be reasonable for populations characterized by having few long-term stable  
93 partnerships, it may fail in populations with frequent short-term casual partnerships.<sup>11</sup>

94 With the retrospective method, partners are enumerated for some period (e.g., all in the last  
95 year) and the partnership’s date of first and last sex are recorded. The partnership intervals are then  
96 evaluated for active overlap at specified time points prior to the survey date. The UNAIDS group  
97 recommended using 6 months prior to survey date to get a point estimate of the active degree. This  
98 method does not require the respondent to predict whether current partnerships will continue, but it  
99 requires accurate recollection of the dates of first/last sex. For surveys that ask for partnership dates  
100 for a limited number of partners (e.g., 5 most recent partners), participants with more sex partners  
101 may reach this limit before the specified number of months prior to survey date. For example, if a  
102 participant’s 5 most recent partnerships occurred within 3 months of the survey date, any additional  
103 partnerships at 6 months prior to the survey date would not be counted. The higher the cumulative  
104 number of partners over time, the more potential there is for downward bias in active degree as you  
105 go back in time.

106 While both methods have been used in surveys of MSM in the U.S.,<sup>12–15</sup> there have been no  
107 comparative studies of these methods for MSM. Compared to heterosexual men and women, active  
108 degree is often higher among MSM, and more heterogenous, reflecting different partnership types of  
109 varying durations and typologies.<sup>16</sup> Furthermore, the biases from truncated partnership data in cross-  
110 sectional studies (also known as fixed choice design and right-censoring of degree) has been well-  
111 documented in the field of network science.<sup>17–19</sup> It would be useful to understand how these  
112 measurement approaches perform for MSM with this survey design.

113 In this study, we compared estimates using the current and the retrospective methods among  
114 U.S. MSM in a survey that allows for estimation with both methods and collects truncated  
115 partnership data. We aimed to understand if partnership data truncation was the main source of bias  
116 for the differences between the current and retrospective method, even after controlling for  
117 demographic variables that may be correlated with both truncation of partnership data and other  
118 mechanisms for bias in mean degree estimates.

119

## 120 **METHODS**

121 *Study Design.* We used data from ARTnet, a cross-sectional web-based study of MSM in the U.S.  
122 conducted between 2017 and 2019.<sup>20</sup> ARTnet recruited participants through the American Men’s  
123 Internet Survey (AMIS), an ongoing study about MSM sexual health.<sup>21</sup> ARTnet eligibility criteria  
124 included age between 15 and 65 years, cisgender male identity, male sex at birth, and having ever  
125 had sex with a male partner. ARTnet recruited AMIS participants and collected data in two waves:  
126 July 2017–February 2018 and September 2018–January 2019. Participants were deduplicated  
127 within and across waves. For participants with more than one survey record, we retained the most  
128 recent survey record from either wave. The Emory University Institutional Review Board approved  
129 this study.

130 *Measures.* ARTnet collected information on egocentric sexual network data, recent sexual behavior,  
131 and utilization of HIV and STI prevention services. Participants were asked to provide information on  
132 up to 5 of their most recent male sexual partners within the last 12 months. Participants reported on  
133 type of partnership (main, casual, or one-time), dates of first and last sex by month and year, and  
134 sexual activity (e.g., condomless anal sex). Participants also answered the question, “Is this  
135 relationship with this partner active and ongoing?” If participants answered “Yes” but reported sex  
136 only once with the partner, then the partnership was considered a one-time partnership and not  
137 factored into mean degree calculations. We ran a sensitivity analysis to understand how an  
138 alternative definition where these partnerships were considered ongoing, casual partnerships and  
139 how imputing “Don’t know” answers to “Yes” impacted the mean degree of casual partnerships.

140 Our main exposure was the truncation of partnership data from limiting partnership information  
141 to the 5 most recent partners. ARTnet also asked participants for the total number of male sexual  
142 partners within the last 12 months, although details such as dates of first/last sex were not collected  
143 on all partners. The main exposure of partnership truncation was operationalized by a binary  
144 variable that split participants by whether they had 5 or fewer partners, including main, casual, or  
145 one-time, or more than 5 partners in the past 12 months. Those with more than 5 male partners in  
146 the past year are considered to have provided truncated partnership data. Our outcome of interest  
147 was a summary measure of active degree (henceforth, degree): the mean degree across all  
148 participants at a specified time point. This measure did not include one-time partnerships, as they

149 are not ongoing. We calculated mean degree using the current method and compared it to mean  
150 degree calculated using the retrospective method at specified months prior to the survey date,  
151 ranging from 0 (current study month) to 12 months. We refer to the months prior to the survey date  
152 as monthly “offsets” (e.g., 6 months prior to the survey date is a 6-month offset). Since participants  
153 reported only month and year for dates of first/last sex in ARTnet, we randomly imputed days within  
154 these months. We conducted a sensitivity analysis to understand how date imputation impacted  
155 mean degree estimates from the retrospective method.

156 *Statistical Analysis.* For descriptive analyses, we plotted mean degree by both current and  
157 retrospective methods by the primary exposure variable of having 5 or fewer or more than 5  
158 partners. Our main outcome was the difference in degree between 12- and 0-month offsets. This  
159 difference provides a measure of stability of the retrospective method across offset months.  
160 Bivariable linear regression was used to estimate that 12-month difference and variations in that  
161 difference by the primary exposure variable and selected demographic variables (e.g., race/ethnicity,  
162 age, geography, education, income) that may also be correlated with bias in mean degree estimates.  
163 In multiple linear regression, we investigated whether variations in the 12- and 0-month degree  
164 difference were caused by the truncation of partnership data, after controlling for race, age, and  
165 education, which we hypothesized as associated with the primary exposure and the outcome. All  
166 analyses were conducted in R 4.2.0.<sup>22</sup> Analysis scripts are provided in a GitHub repository  
167 (<https://github.com/EpiModel/Mean-Degree-Analysis>).

168

## 169 **RESULTS**

170 Of the 4,904 MSM who completed the ARTnet study, most were non-Hispanic white, less than 35  
171 years old, completed college or above, and had an annual household income of at least \$40,000  
172 (**Table 1**). A total of 16,198 partnerships were reported by the participants. Of these, 7,602 (46.9%)  
173 were one-time partnerships, 5,978 (36.9%) were casual partnerships, and 2,618 (16.2%) were main  
174 partnerships. On the day of survey, 5,875 (68.3%) of main and casual partnerships were reported as  
175 ongoing. Overall, 1,962 (40.0%) of participants had more than 5 partners (main, casual, and one-  
176 time) in the past 12 months.

177 Mean degree estimates varied by partnership type for both measurement approaches. Using  
178 the current method, total mean degree was 1.19 across partnership types: 0.45 for main and 0.74 for

179 casual partnerships (**Figure 2**). Mean degree estimates ranged from 1.01 at the 12-month offset to  
180 1.23 at the 1-month offset across all partnerships. Mean degree ranged from 0.38 (12-month offset)  
181 to 0.45 (0-month offset) for main partnerships and from 0.64 (12-month offset) to 0.78 (1-month  
182 offset) for casual partnerships.

183 The mean degrees estimated by the retrospective method decreased as the month offsets  
184 increased from 1 to 12 months (**Figure 2**). Mean degree estimated at the 0-month offset was the  
185 same as the mean degree estimated from the current method across all partnership types, which is  
186 expected given that the 0-month offset date is the same as the survey date for each participant.  
187 Mean degree of main partnerships from the current method (0.45) was most similar to estimates  
188 between 1- and 2-month offsets (0.45–0.44), while for casual partnerships, the current estimate  
189 (0.75) was most similar to mean degree estimated at 5- and 6-month offsets (0.76, 0.73). Overall  
190 mean degree estimated with the current method (1.19) was most similar to mean degree at the 4-  
191 month offset (1.19) across all partnerships.

192 When stratifying by having 5 or fewer or more than 5 partners in the past 12 months, the  
193 decreasing trend of mean degree was largely explained by participants who had more than 5  
194 partners (**Figure 3**). Participants with more than 5 partners in the past year did not have the  
195 opportunity to share information on more than 5 of their partners, and therefore, the partnerships  
196 reported may be biased to the most recent partnerships. For main partnerships, there continued to  
197 be a decreasing trend of mean degree observed between the 1- and 12-month offsets (0.48 to 0.42)  
198 for participants with 5 or fewer partnerships in the past year; however, this did not impact the stability  
199 of the overall mean degree when restricted to participants with 5 or fewer partnerships. Mean degree  
200 remained stable from 0.83 at 1-month offset to 0.80 at 12-month offset for participants with 5 or  
201 fewer partners in the past year, but mean degree decreased from 1.83 at 1-month offset to 1.34 at  
202 12-month offset for those with more than 5 partners. A similar pattern was found for casual mean  
203 degree. Among participants with 5 or fewer partners, casual mean degree was relatively stable from  
204 0.35 at 1-month offset to 0.37 at 12-month offset. For participants with more than 5 partners, casual  
205 mean degree decreased from 1.44 at 1-month offset to 1.04 at 12-month offset. **Supplemental**  
206 **Table 1** describes mean degree estimates using both methods by participant and partnership  
207 characteristics for 0-, 3-, 6-, and 12-month offsets.

208 Bivariable and multivariable linear regression further confirmed that the primary exposure of  
209 partnership truncation was the principal cause of the decreasing trend of retrospective mean degree

210 estimates, particularly for casual partnerships. Race/ethnicity, age, and education were found to be  
211 potential confounders of the relationship between truncation of partnership data and the downward  
212 bias of mean degree in the retrospective method (**Table 2; Supplemental Table 2; Supplemental**  
213 **Figures 1–5**). The negative association between average change in degree and number of male  
214 partners in the past year remained after adjusting for demographics. The average change in main  
215 degree between 12- and 0-month offsets among participants with more than 5 partners in the past  
216 year compared to those with 5 or fewer partners was -0.04 (95% CI: -0.07, -0.02) in unadjusted  
217 analysis and -0.05 (95% CI: -0.08, -0.03) in adjusted analysis (**Table 2**). For casual partnerships  
218 among participants with more than 5 partners compared to 5 or fewer partners, the unadjusted  
219 average change in degree was -0.41 (95% CI: -0.46, -0.36) and adjusted average change in degree  
220 was -0.40 (95% CI: -0.45, -0.35).

221 In a sensitivity analysis on the influence of date imputation on retrospective mean degree,  
222 random date imputation had little effect on mean degree (**Supplemental Table 5**). When  
223 considering the minimum mean degree (sexual partnerships were not active during the entire month  
224 reported) and maximum mean degree (sexual partnerships were active during the entire month  
225 reported), there was an average percent change of 2–3%.

226 Twenty percent of one-time partnerships were considered active and ongoing on the day of the  
227 survey, but these partnerships were considered one-time partnerships and not included in mean  
228 degree estimation because participants had sex with these partners once. In a sensitivity analysis  
229 we redefined these partnerships as active, casual partnerships and considered a scenario where a  
230 proportion of “Don’t know” responses were “Yes.” These alternative definitions suggest our original  
231 definition may be underestimating the casual mean degree using the current method and the  
232 retrospective method at the 0-month offset (**Supplemental Table 6**). There was no effect on the  
233 retrospective mean degree beyond the 0-month offset.

234

## 235 **DISCUSSION**

236 In this study, we compared the current and the retrospective methods of measuring mean degree in  
237 a sample of U.S. MSM. The two methods produced similar estimates of mean degree for participants  
238 with fewer past-year partners. With the retrospective method, mean degree estimates decreased as  
239 the retrospective measure of degree was calculated at more months prior to the survey date. This



240 was due to truncated partnership data from the survey design: information used to calculate mean  
241 degree such as dates of first/last sex were collected on up to 5 of the most recent partners. Our  
242 results suggest that this downward bias leads to underestimation of degree, especially of casual  
243 partnerships, using the retrospective method when surveys have truncated partnership data.  
244 Underestimation of degree may impact projected transmission of HIV in simulated networks.<sup>23,24</sup> The  
245 current method of measurement is less prone to bias from truncated partnership data but may have  
246 its own flaws.

247         With 2 in 5 ARTnet participants reporting more than 5 main, casual, and one-time male  
248 sexual partners in the past year, the truncation of partnership data had a major impact on mean  
249 degree estimation with the retrospective method. This was particularly true for casual partnerships,  
250 which were more prevalent compared to main partnerships in our sample. An exploration of a few  
251 cases with large differences in degree between 12- and 0-month offsets may offer some explanation  
252 for the downward bias (**Supplemental Figures 6–7**). For example, in **Supplemental Figure 7**, study  
253 participant 4 reported 15 male sexual partners in the past 12 months but was only able to report on  
254 the 5 most recent partners, which were all considered ongoing on the day of survey but not active at  
255 12 months prior to the survey date. This person's degree would be 0 at the 12-month offset but 5 at  
256 the 0-month offset, resulting in a difference of -5. Since participants were asked to report on their  
257 most recent partnerships, participants with truncated partnership data were likely to only report on  
258 partnerships closer to the survey date before exhausting their responses, leading to underestimation  
259 of degree as month offsets increased. Furthermore, reporting on more one-time partnerships, which  
260 don't contribute to mean degree, may censor main and casual partnerships in the past year and  
261 underestimate mean degree.

262         A direct comparison of the current method to the UNAIDS-recommended retrospective  
263 method at 6 months using ARTnet data shows that the percent of participants reporting more than 1  
264 partner at both time points was similar and total, main, and casual mean degree was slightly smaller  
265 when estimated at the 6-month offset (**Supplemental Table 7**). The distribution of degree for both  
266 time points were also similar (**Supplemental Figure 8**). The retrospective method may still be a  
267 suitable alternative to the current method if there was no truncation of partnership data in the  
268 behavioral survey or if information on the active status of current partnerships was not collected and  
269 if mean degree is estimated within 6 months of the survey date.

270 The current or retrospective measurement methods have been applied to the estimation of  
271 partnership concurrency (degree of two or more), aligning generally with our current study. One  
272 study of young adults in the U.S. directly comparing reported partnership concurrency within the last  
273 6 years through direct questioning and overlapping partnership dates found both methods reported a  
274 similar prevalence of concurrency.<sup>25</sup> However, the agreement about concurrent partnerships  
275 between the two methods was only modest, with the authors suggesting that measuring concurrency  
276 using overlapping partnership dates was more likely to be complicated by missing or uninterpretable  
277 data. Another study of heterosexual partnerships in Malawi found that measuring concurrency using  
278 partnership dates underestimated self-reported concurrency due to difficulty of recalling partnership  
279 start and end dates and general underreporting of partnerships.<sup>26</sup> The current method may be  
280 statistically preferable because both mean active degree and partnership age can be jointly  
281 estimated with typical distributional assumptions.<sup>20,27</sup> On the other hand, study participants may not  
282 be able to accurately predict whether current partnerships will continue, leading to overestimation of  
283 mean active degree using the current method.<sup>11</sup> The current method is not perfect, and bias  
284 adjustment or improvement of the measurement method is needed. Our analysis was unable to  
285 identify current partners that were truly active and ongoing because we did not collect follow-up data.  
286 Future studies may consider the use of longitudinal data where behavioral surveys administered at  
287 multiple time points collect data on a limited number of existing and new partners. This study design  
288 could evaluate the severity of the bias from truncation partnership data compared to bias from  
289 participants' failure to predict ongoing partnerships.

290 *Limitations.* There are some limitations to this study. First, only month and year of dates of first/last  
291 sex were reported for each partnership. Partnerships with start or end months that were the same as  
292 the month of the retrospective date from the date of survey could be considered ongoing or not  
293 ongoing depending on the exact day of first/last sex. To address this, we randomly imputed the day  
294 for the start and end dates to identify partnerships overlapping with the retrospective date. A  
295 sensitivity analysis found that the average percent change of mean degree for more extreme  
296 assumptions was minimal. Second, this study was limited to cross-sectional data, which may be  
297 useful because many studies estimate mean degree from cross-sectional data, but longitudinal  
298 studies may be able to describe unique biases from cross-sectional data such as the prediction of  
299 ongoing partnerships.<sup>11</sup> Third, ARTnet coding decisions around one-time partnerships and “Do not  
300 know” responses for the question of whether a partnership is active and ongoing may lead to

301 underestimation of mean degree using the current method or retrospective 0-month offset, which  
302 was confirmed through a sensitivity analysis. Given prior research that suggests MSM may be  
303 overconfident in predicting which sexual partnerships are ongoing,<sup>11</sup> we used the original method as  
304 a conservative measure.

305 *Conclusion.* Sexual mean active degree is an important measure in HIV and STI epidemiology. It  
306 should therefore be measured rigorously and estimated consistently across studies. Future network-  
307 based studies should justify their methods for mean active degree measurement with special  
308 consideration of how data is collected. Our analysis suggests that cross-sectional data with  
309 truncated partnership data may underestimate mean degree using the retrospective method,  
310 favoring the current method. However, improvements can further be made to the current method to  
311 address bias in predicting persistence of partnerships.<sup>11</sup> The accuracy of the active degree estimates  
312 will have important impacts on the delivery of HIV/STI prevention interventions that target networks.

## 313 REFERENCES

- 314 1. Centers for Disease Control and Prevention. HIV Surveillance Report, 2018 [Internet]. 2018 Nov. Report No.:  
315 29. Available from: <http://www.cdc.gov/hiv/library/reports/hiv-surveillance.html>.
- 316 2. Centers for Disease Control and Prevention. Sexually Transmitted Disease Surveillance 2018 [Internet]. 2019.  
317 Available from: <https://www.cdc.gov/std/stats>
- 318 3. Millett GA, Flores SA, Peterson JL, et al. Explaining disparities in HIV infection among black and white men  
319 who have sex with men: a meta-analysis of HIV risk behaviors. *AIDS*. 2007 Oct 1;21(15):2083–91.
- 320 4. Mustanski B, Morgan E, D'Aquila R, et al. Individual and Network Factors Associated With Racial Disparities in  
321 HIV Among Young Men Who Have Sex With Men. *J Acquir Immune Defic Syndr*. 2019 Jan;80(1):24–30.
- 322 5. Morris M, Kurth AE, Hamilton DT, et al. Concurrent partnerships and HIV prevalence disparities by race: linking  
323 science and public health practice. *Am J Public Health*. 2009;99(6):1023–31.
- 324 6. Teixeira da Silva D, Bouris A, Ramachandran A, et al. Embedding a Linkage to Pre-Exposure Prophylaxis  
325 (PrEP) Care Intervention in Social Network Strategy and Partner Notification Services: Results from a Pilot  
326 Randomized Controlled Trial. *J Acquir Immune Defic Syndr*. 2021;86(2):191–9.
- 327 7. Erdos P, Rényi A. On the evolution of random graphs. *Publ Math Inst Hung Acad Sci*. 1960;5(1):17–60.
- 328 8. Eaton JW, Hallett TB, Garnett GP. Concurrent sexual partnerships and primary HIV infection: a critical  
329 interaction. *AIDS Behav*. 2011;15(4):687–92.
- 330 9. Carnegie NB, Morris M. Size matters: concurrency and the epidemic potential of HIV in small networks. *PLoS*  
331 *ONE*. 2012;7(8):e43048.
- 332 10. Eaton J, Case, Kelsey, secretariat of the UNAIDS Reference Group on Estimates, Modelling, and Projections.  
333 Consultation on Concurrent Sexual Partnerships [Internet]. UNAIDS; 2009 Jun p. 19. Available from:  
334 [http://www.epidem.org/sites/default/files/content/resources/attachments/Concurrency%20meeting%20recomm](http://www.epidem.org/sites/default/files/content/resources/attachments/Concurrency%20meeting%20recommendations_Final.pdf)  
335 [endations\\_Final.pdf](http://www.epidem.org/sites/default/files/content/resources/attachments/Concurrency%20meeting%20recommendations_Final.pdf)
- 336 11. Uong S, Rosenberg ES, Goodreau SM, et al. Assessment of Bias in Estimates of Sexual Network Degree  
337 using Prospective Cohort Data. *Epidemiology*. 2020 Mar;31(2):229–37.
- 338 12. Jenness SM, Johnson JA, Hoover KW, et al. Modeling an integrated HIV prevention and care continuum to  
339 achieve the ending the HIV epidemic goals. *AIDS*. 2020;34(14):2103–13.
- 340 13. Maloney KM, Driggers RA, Sarkar S, et al. Projected Impact of Concurrently Available Long-Acting Injectable  
341 and Daily-Oral HIV Pre-Exposure Prophylaxis. *J Infect Dis*. 2021;223(1):72–82.
- 342 14. Jenness SM, Le Guillou A, Chandra C, et al. Projected HIV and Bacterial Sexually Transmitted Infection  
343 Incidence Following COVID-19-Related Sexual Distancing and Clinical Service Interruption. *J Infect Dis*. 2021  
344 Mar 29;223(6):1019–28.
- 345 15. Janulis P, Phillips G, Birkett M, et al. Sexual Networks of Racially Diverse Young MSM Differ in Racial  
346 Homophily But Not Concurrency. *J Acquir Immune Defic Syndr*. 2018 Apr;77(5):459–66.
- 347 16. Glick SN, Morris M, Foxman B, et al. A Comparison of Sexual Behavior Patterns Among Men Who Have Sex  
348 With Men and Heterosexual Men and Women. *J Acquir Immune Defic Syndr*. 2012;60(1):83–90.
- 349 17. Holland PW, Leinhardt S. The structural implications of measurement error in sociometry. *J Math Sociol*. 1973  
350 Jul 1;3(1):85–111.
- 351 18. Kossinets G. Effects of missing data in social networks. *Soc Netw*. 2006 Jul 1;28(3):247–68.

- 352 19. Gommans R, Cillessen AHN. Nominating under constraints: A systematic comparison of unlimited and limited  
353 peer nomination methodologies in elementary school. *Int J Behav Dev.* 2015 Jan 1;39(1):77–86.
- 354 20. Weiss KM, Goodreau SM, Morris M, et al. Egocentric sexual networks of men who have sex with men in the  
355 United States: Results from the ARTnet study. *Epidemics.* 2020 Jan 24;30:100386.
- 356 21. Sanchez TH, Sineath RC, Kahle EM, et al. The Annual American Men’s Internet Survey of Behaviors of Men  
357 Who Have Sex With Men in the United States: Protocol and Key Indicators Report 2013. *JMIR Public Health  
358 Surveill.* 2015;1(1):e3.
- 359 22. R Core Team. R: A Language and Environment for Statistical Computing [Internet]. Vienna, Austria: R  
360 Foundation for Statistical Computing; 2019. Available from: <https://www.R-project.org/>
- 361 23. Harling G, Onnela J-P. Impact of degree truncation on the spread of a contagious process on networks. *Netw  
362 Sci.* 2018 Mar;6(1):34–53.
- 363 24. Anderson EJ, Weiss KM, Morris MM, et al. HIV and Sexually Transmitted Infection Epidemic Potential of  
364 Networks of Men Who Have Sex With Men in Two Cities. *Epidemiology.* 2021 Sep 1;32(5):681–9.
- 365 25. Nelson SJ, Manhart LE, Gorbach PM, et al. Measuring sex partner concurrency: it’s what’s missing that counts.  
366 *Sex Transm Dis.* 2007;34(10):801–7.
- 367 26. Glynn JR, Dube A, Kayuni N, et al. Measuring concurrency: an empirical study of different methods in a large  
368 population-based survey and evaluation of the UNAIDS guidelines. *AIDS.* 2012 May 15;26(8):977–85.
- 369 27. Krivitsky P, Morris M. Inference for Social Network Models from Egocentrically-Sampled Data, with Application  
370 to Understanding Persistent Racial Disparities in HIV Prevalence in the US. *Ann Appl Stat.* 2017;11(1):427–55.
- 371

## TABLES

**Table 1.** Individual- and Sexual Partnership-level Characteristics of Participants in ARTnet Study (2017–2019) of Men who have Sex with Men in the U.S.

| <b>Individual</b>                                    | <b>N</b> | <b>%</b> |
|------------------------------------------------------|----------|----------|
| <b>Total Sample</b>                                  | 4904     | 100.0    |
| <b>Age (Mean and SD)</b>                             | 36.5     | 14.2     |
| <b>Age Category</b>                                  |          |          |
| 15–24                                                | 1324     | 27.0     |
| 25–34                                                | 1268     | 25.9     |
| 35–44                                                | 694      | 14.2     |
| 45–54                                                | 833      | 17.0     |
| 55–65                                                | 785      | 16.0     |
| <b>Race/Ethnicity</b>                                |          |          |
| Black (Non-Hispanic)                                 | 266      | 5.4      |
| Hispanic                                             | 676      | 13.8     |
| Other (Non-Hispanic)                                 | 439      | 9.0      |
| White (Non-Hispanic)                                 | 3523     | 71.8     |
| <b>Residence in Census Region</b>                    |          |          |
| Northeast                                            | 882      | 18.0     |
| Midwest                                              | 994      | 20.3     |
| South                                                | 1782     | 36.3     |
| West                                                 | 1246     | 25.4     |
| <b>Residence in Census Division</b>                  |          |          |
| New England                                          | 250      | 5.1      |
| Middle Atlantic                                      | 632      | 12.9     |
| East North Central                                   | 698      | 14.2     |
| West North Central                                   | 296      | 6.0      |
| South Atlantic                                       | 1062     | 21.7     |
| East South Central                                   | 222      | 4.5      |
| West South Central                                   | 498      | 10.2     |
| Mountain                                             | 404      | 8.2      |
| Pacific                                              | 842      | 17.2     |
| <b>Education</b>                                     |          |          |
| High school or below                                 | 616      | 12.6     |
| Some college                                         | 1519     | 31.1     |
| College and above                                    | 2742     | 56.2     |
| <b>Annual Household Income</b>                       |          |          |
| \$0 to \$19,999                                      | 605      | 13.7     |
| \$20,000 to \$39,999                                 | 867      | 19.6     |
| \$40,000 to \$74,999                                 | 1258     | 28.5     |
| \$75,000 or more                                     | 1686     | 38.2     |
| <b>Number of Male Partners in the Past 12 Months</b> |          |          |
| ≤ 5 Partners                                         | 2939     | 59.9     |
| > 5                                                  | 1962     | 40.0     |
| <b>Sexual Partnerships<sup>a</sup></b>               | <b>N</b> | <b>%</b> |
| <b>Total Sample</b>                                  | 16198    | 100.0    |
| <b>Sexual Partnership Type</b>                       |          |          |
| Main                                                 | 2618     | 16.2     |
| Casual                                               | 5978     | 36.9     |
| One-time                                             | 7602     | 46.9     |
| <b>Self-Reported Ongoing on Day of Survey</b>        |          |          |
| Yes                                                  | 7289     | 45.0     |
| No                                                   | 8909     | 55.0     |

<sup>a</sup> The ARTnet survey allows participants to report details on up to 5 of the most recent sexual male partners within the past 12 months of taking the survey.

**Table 2.** Bivariable linear regression results of average change in degree between 12 months and 0 months prior to survey date using the retrospective method for main and casual sexual partnerships of male participants (N = 4,904) in the ARTnet study (2017–2019)

|                                            | Main Partnerships |              |                | Casual Partnerships |                |                |
|--------------------------------------------|-------------------|--------------|----------------|---------------------|----------------|----------------|
|                                            | Estimate          | 95% CI       | F-Test P-value | Estimate            | 95% CI         | F-Test P-value |
| <b>Number of Male Partners<sup>a</sup></b> |                   |              | <0.01          |                     |                | <0.01          |
| Intercept (≤ 5 Partners)                   | -0.06             | -0.07, -0.04 |                | 0.06                | 0.03, 0.09     |                |
| > 5                                        | -0.04             | -0.07, -0.02 |                | -0.41               | -0.46, -0.36   |                |
| <b>Race/Ethnicity</b>                      |                   |              | 0.05           |                     |                | 0.16           |
| Intercept (Black)                          | -0.02             | -0.07, 0.02  |                | -0.01               | -0.11, 0.10    |                |
| Hispanic                                   | -0.08             | -0.13, -0.02 |                | -0.07               | -0.20, 0.04    |                |
| Other                                      | -0.04             | -0.10, 0.01  |                | -0.09               | -0.22, 0.04    |                |
| White                                      | -0.05             | -0.10, -0.01 |                | -0.11               | -0.23, 0.01    |                |
| <b>Age (continuous)</b>                    | 0.003             | 0.002, 0.004 | <0.01          | -0.003              | -0.005, -0.001 | <0.01          |
| <b>Age Category</b>                        |                   |              | <0.01          |                     |                | <0.01          |
| Intercept (15-24 years)                    | -0.15             | -0.17, -0.13 |                | -0.03               | -0.08, 0.01    |                |
| 25-34 years                                | 0.09              | 0.06, 0.12   |                | -0.07               | -0.14, -0.01   |                |
| 35-44 years                                | 0.09              | 0.05, 0.12   |                | -0.10               | -0.18, -0.02   |                |
| 45-54 years                                | 0.11              | 0.08, 0.15   |                | -0.15               | -0.23, -0.07   |                |
| 55-65 years                                | 0.13              | 0.09, 0.16   |                | -0.11               | -0.19, -0.03   |                |
| <b>Census Region</b>                       |                   |              | 0.28           |                     |                | 0.15           |
| Intercept (Northeast)                      | -0.06             | -0.08, -0.03 |                | -0.14               | -0.20, -0.08   |                |
| Midwest                                    | -0.03             | -0.07, 0.00  |                | 0.07                | -0.01, 0.15    |                |
| South                                      | -0.02             | -0.05, 0.01  |                | 0.05                | -0.02, 0.12    |                |
| West                                       | -0.02             | -0.05, 0.02  |                | 0.00                | -0.08, 0.07    |                |
| <b>Highest Level of Education</b>          |                   |              | <0.01          |                     |                | <0.01          |
| Intercept (High school or below)           | -0.12             | -0.15, -0.09 |                | -0.06               | -0.13, 0.01    |                |
| Some college                               | 0.05              | 0.01, 0.08   |                | 0.03                | -0.05, 0.11    |                |
| College and above                          | 0.06              | 0.03, 0.09   |                | -0.11               | -0.18, -0.03   |                |
| <b>Annual Household Income</b>             |                   |              | 0.44           |                     |                | <0.01          |
| Intercept (\$0 to \$19,999)                | -0.08             | -0.11, -0.05 |                | -0.01               | -0.08, 0.05    |                |
| \$20,000 to \$39,999                       | 0.00              | -0.04, 0.04  |                | -0.08               | -0.17, 0.01    |                |
| \$40,000 to \$74,999                       | 0.00              | -0.04, 0.04  |                | -0.07               | -0.15, 0.02    |                |
| \$75,000 or more                           | 0.02              | -0.02, 0.05  |                | -0.16               | -0.24, -0.08   |                |

<sup>a</sup> The ARTnet survey allows participants to report details such as dates of first and last sex on up to 5 of the most recent sexual male partners within the past 12 months of taking the survey. Participants are also asked about the total number of male sexual partners they have had within the past 12 months but do not report details used to calculate mean degree on all of these partners.

**Figure 1.** Schematic representation of how mean degree is calculated using hypothetical sexual partnership data with the retrospective method when measuring mean degree at three months prior to survey date and the current method where mean degree is measured on survey date. Mean degree can be calculated for main and casual sexual partnerships, and one-time partnerships are not included in the calculation by definition as they are not ongoing sexual partnerships.

| Study ID | Partner ID | Partner Type | Months Prior to Survey Date |   |   |   |   |   |   | Day of Survey | Retrospective Method Measured at 3 Months Prior to Survey Date |             | Current Method Measured on Day of Survey |             |   |   |
|----------|------------|--------------|-----------------------------|---|---|---|---|---|---|---------------|----------------------------------------------------------------|-------------|------------------------------------------|-------------|---|---|
|          |            |              | 6                           | 5 | 4 | 3 | 2 | 1 | 0 |               | Partnership Ongoing?                                           | Mean Degree | Partnership Ongoing?                     | Mean Degree |   |   |
| 1        | 1          | Casual       |                             |   |   |   |   |   |   |               | No                                                             | 1           |                                          | No          | 1 |   |
|          | 2          | Main         |                             |   |   |   |   |   |   |               | Yes                                                            | 1           |                                          | Yes         | 1 |   |
| 2        | 1          | Casual       |                             |   |   |   |   |   |   |               | No                                                             |             |                                          | No          |   |   |
|          | 2          | One-Time     |                             |   |   |   |   |   |   |               | No                                                             |             |                                          | No          |   |   |
|          | 3          | Main         |                             |   |   |   |   |   |   |               | Yes                                                            | 2           | 1                                        | No          | 1 | 1 |
|          | 4          | Casual       |                             |   |   |   |   |   |   |               | Yes                                                            |             |                                          | Yes         |   |   |
| 3        | 1          | Casual       |                             |   |   |   |   |   |   |               | No                                                             | 0           |                                          | Yes         | 1 |   |

  

|                                                                | Mean Degree |        |       |
|----------------------------------------------------------------|-------------|--------|-------|
|                                                                | Main        | Casual | Total |
| Retrospective Method Measured at 3 Months Prior to Survey Date | 2/3         | 1/3    | 1     |
| Current Method Measured on Day of Survey                       | 1/3         | 2/3    | 1     |



**Figure 2.** Comparison of mean degree calculated using the retrospective method from 0 to 12 months prior to survey date and mean degree calculated by the current method on the day of survey among all, main, and casual male sexual partnerships of 4,904 ARTnet participants.

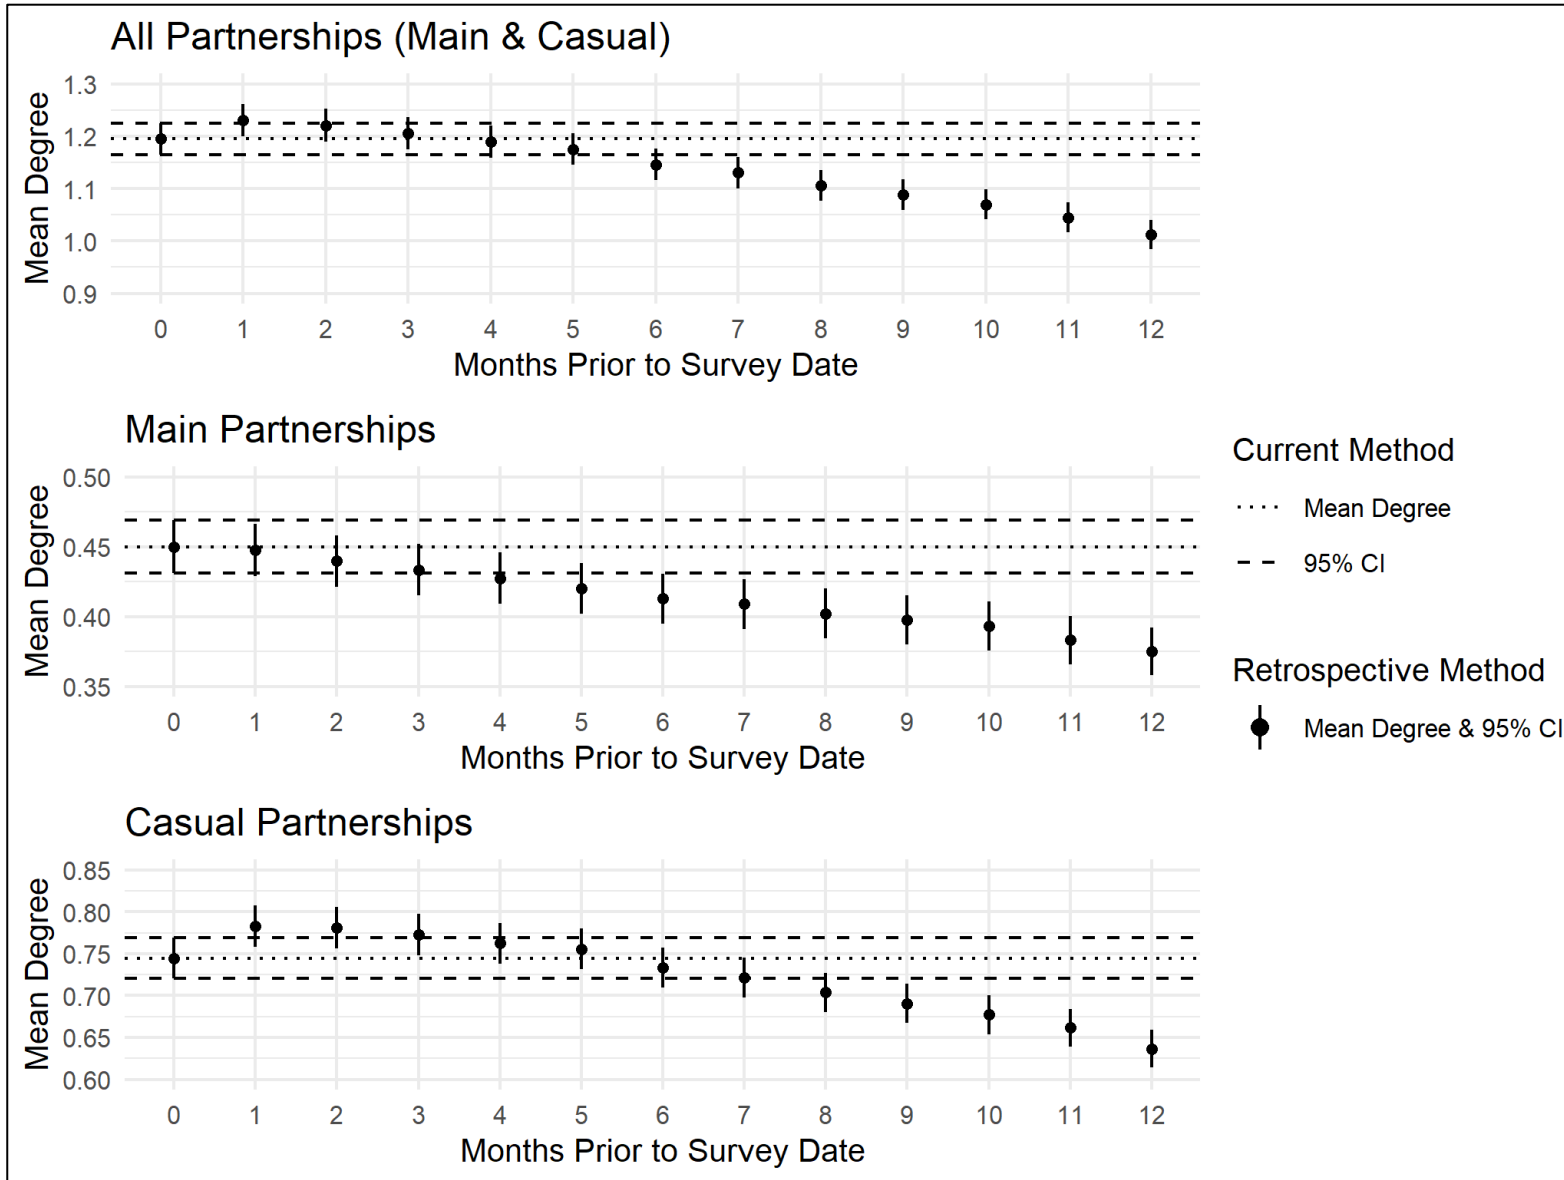

**Figure 3.** Comparison of mean degree calculated using the retrospective method from 0 to 12 months prior to survey date and mean degree calculated by the current method on the day of survey among all, main, and casual male sexual partnerships of 4,904 ARTnet participants (2017–2019) stratified by having 5 or fewer partners or more than 5 partners. ARTnet participants were only able to report on dates of first and last sex and whether partnerships were ongoing on a maximum of 5 partners, restricting calculation of mean degree to the 5 most recent partners.

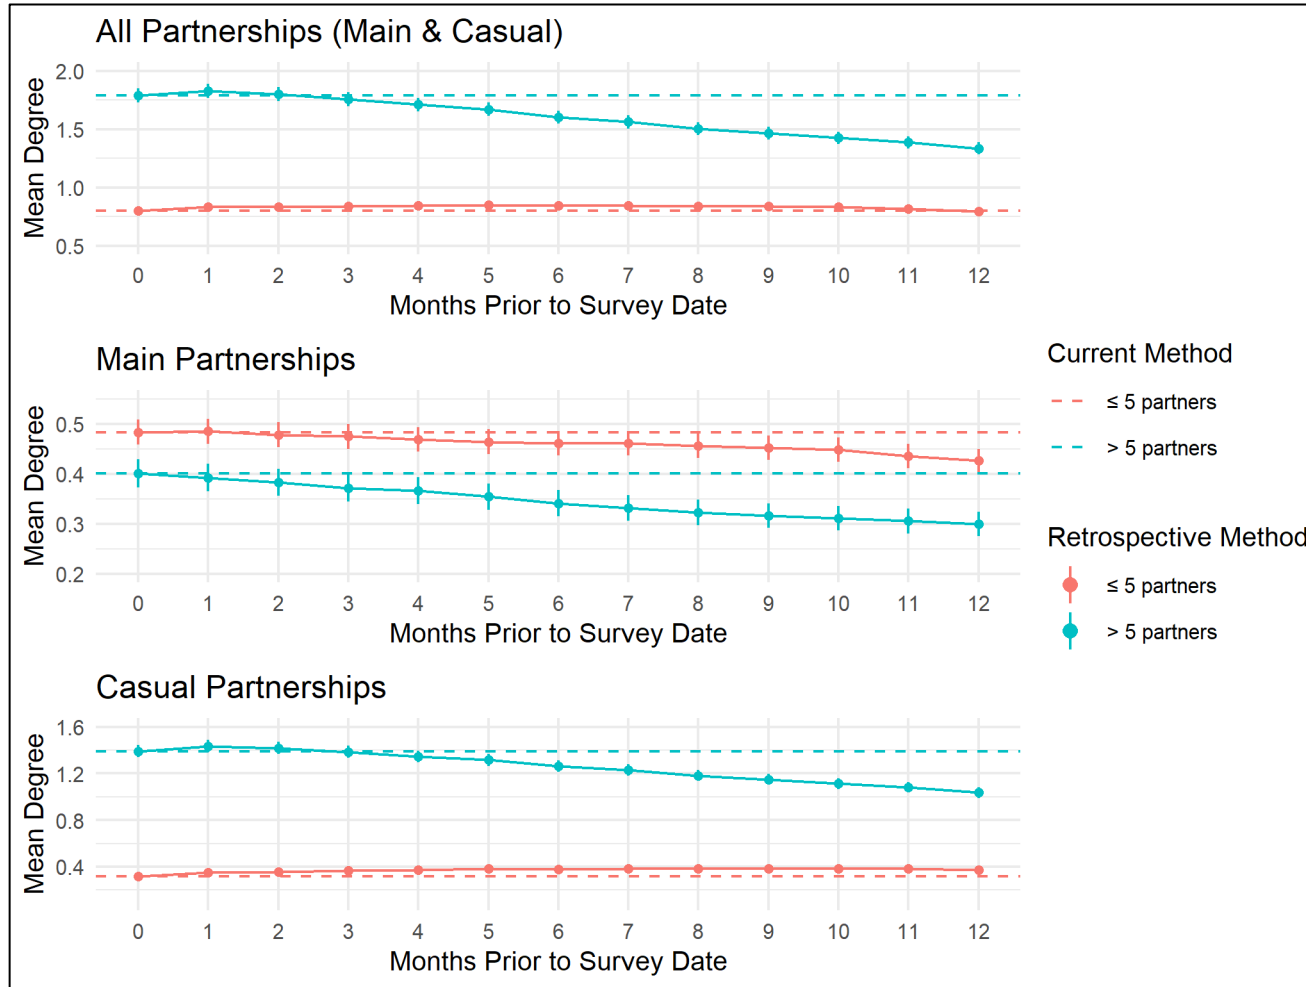

Source: https://medrxiv.org/content/10.1101/2022.02.11.22270855v2.full.pdf
